# Supplementary material for: Theoretical design of rhombohedral-stacked MoS2-based ferroelectric tunneling junctions with ultra-high tunneling electroresistances
Source: Royal Society of Chemistry journal article supplement (doi:10.1039/d4cp02278e), 2024-01-01
Supplement: d4cp02278e1.pdf [file d4cp02278e1.pdf]

## Supporting Information

### **Theoretical Design of Rhombohedral-Stacked MoS<sub>2</sub>-Based Ferroelectric Tunneling Junctions with Ultra-High Tunneling Electroresistances**

Huamin Hu<sup>1</sup>, Guang Zeng<sup>1\*</sup>, and Gang Ouyang<sup>2\*</sup>

*<sup>1</sup>School of Materials Science and Engineering, Changsha University of Science and  
Technology, Changsha 410114, China*

*<sup>2</sup>Key Laboratory of Low-Dimensional Quantum Structures and Quantum Control of  
Ministry of Education, School of Physics and Electronics, Hunan Normal University,  
Changsha 410081, China*

\*Corresponding authors. E-mail: [zengguang@csust.edu.cn](mailto:zengguang@csust.edu.cn) (G. Zeng),  
[gangouy@hunnu.edu.cn](mailto:gangouy@hunnu.edu.cn) (G. Ouyang)

Figure S1

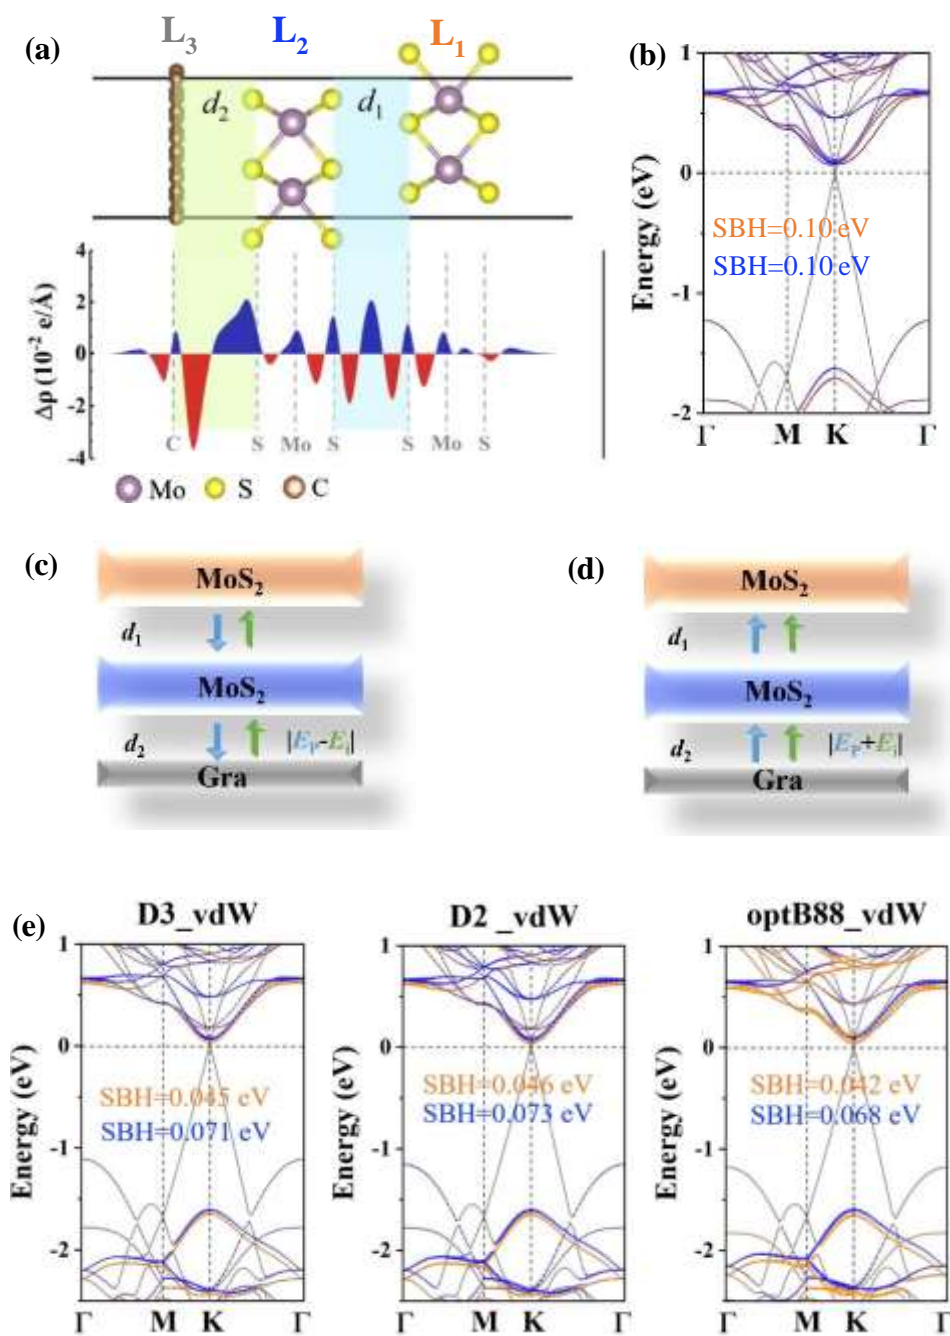

**Figure S1.** (a) Atomic structure, differential charge density and (b) band structure of Gra/2H-MoS<sub>2</sub>. (c, d) Schematic of the interaction between the ferroelectric polarized electric field ( $E_p$ ) and the built-in electric field ( $E_i$ ). (e) Band structure of Gra/2R-MoS<sub>2</sub> P $\uparrow$  with D3, D2, and optB88 vdW correction.

**Figure S2**

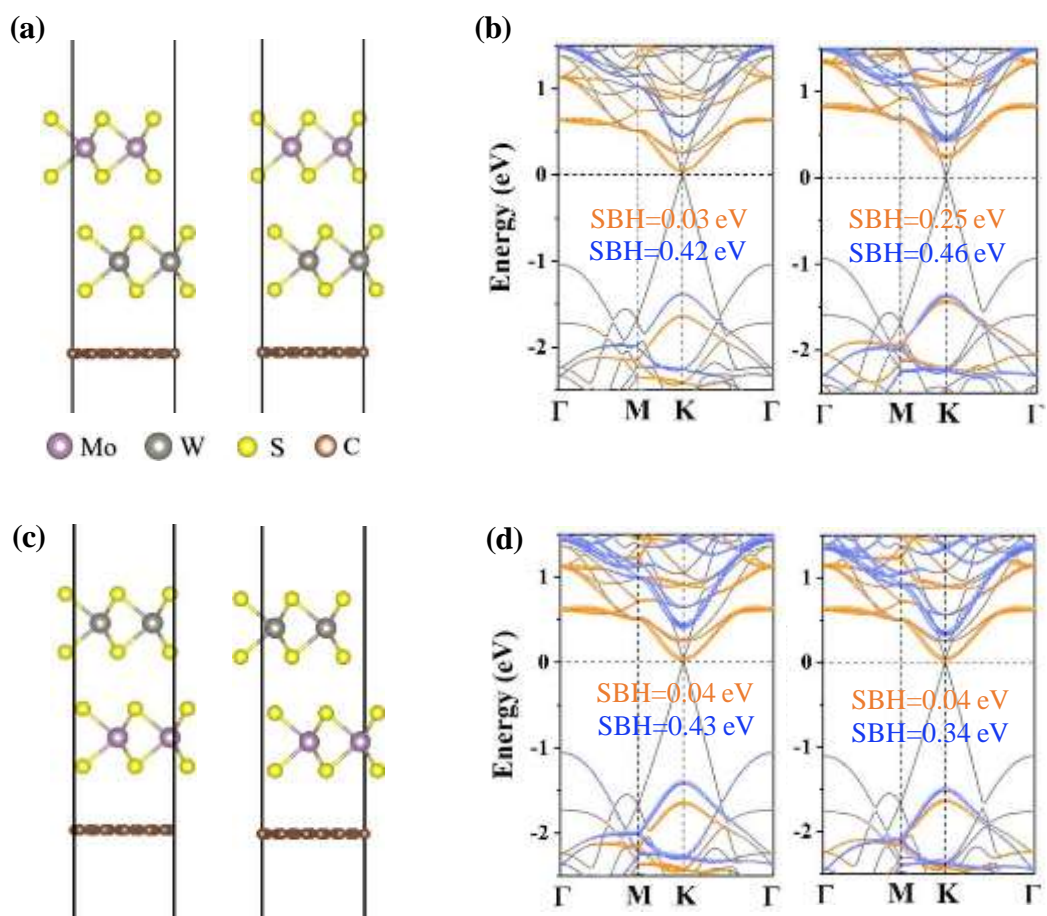

**Figure S2.** Atomic structures and band structures of Gra/WS<sub>2</sub>/MoS<sub>2</sub> (a, b), as well as Gra/MoS<sub>2</sub>/WS<sub>2</sub> (c, d).

**Figure S3**

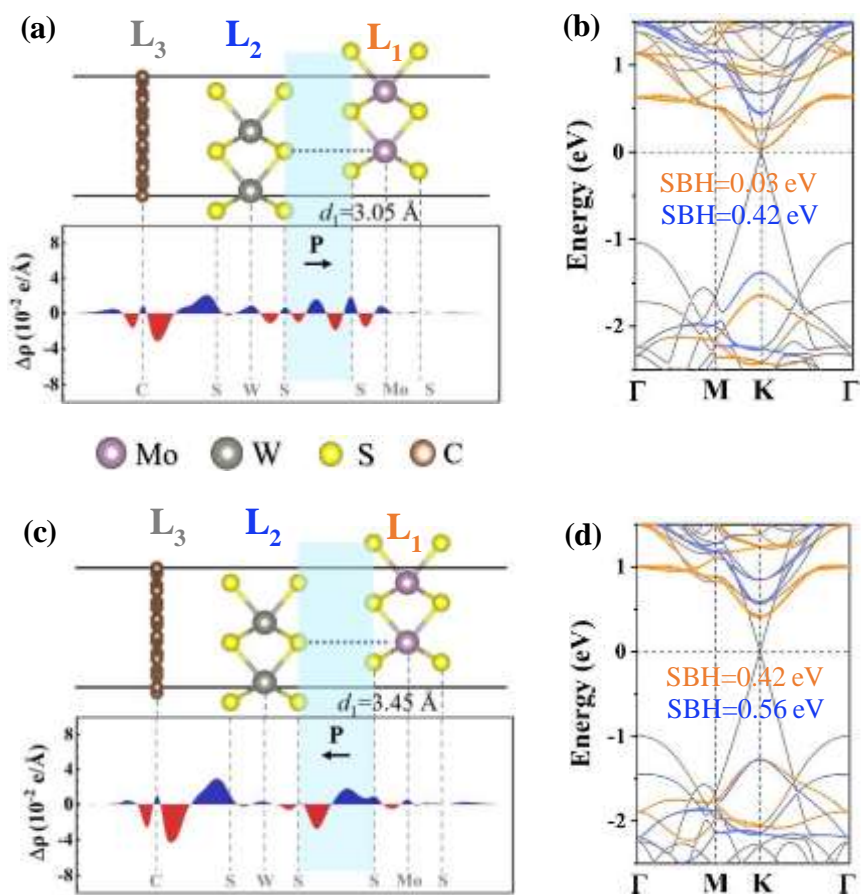

**Figure S3.** Planar differential charge density (a, c) and band structure (b, d) of Gra/WS<sub>2</sub>/MoS<sub>2</sub> P<sup>↑</sup> state.

Figure S4

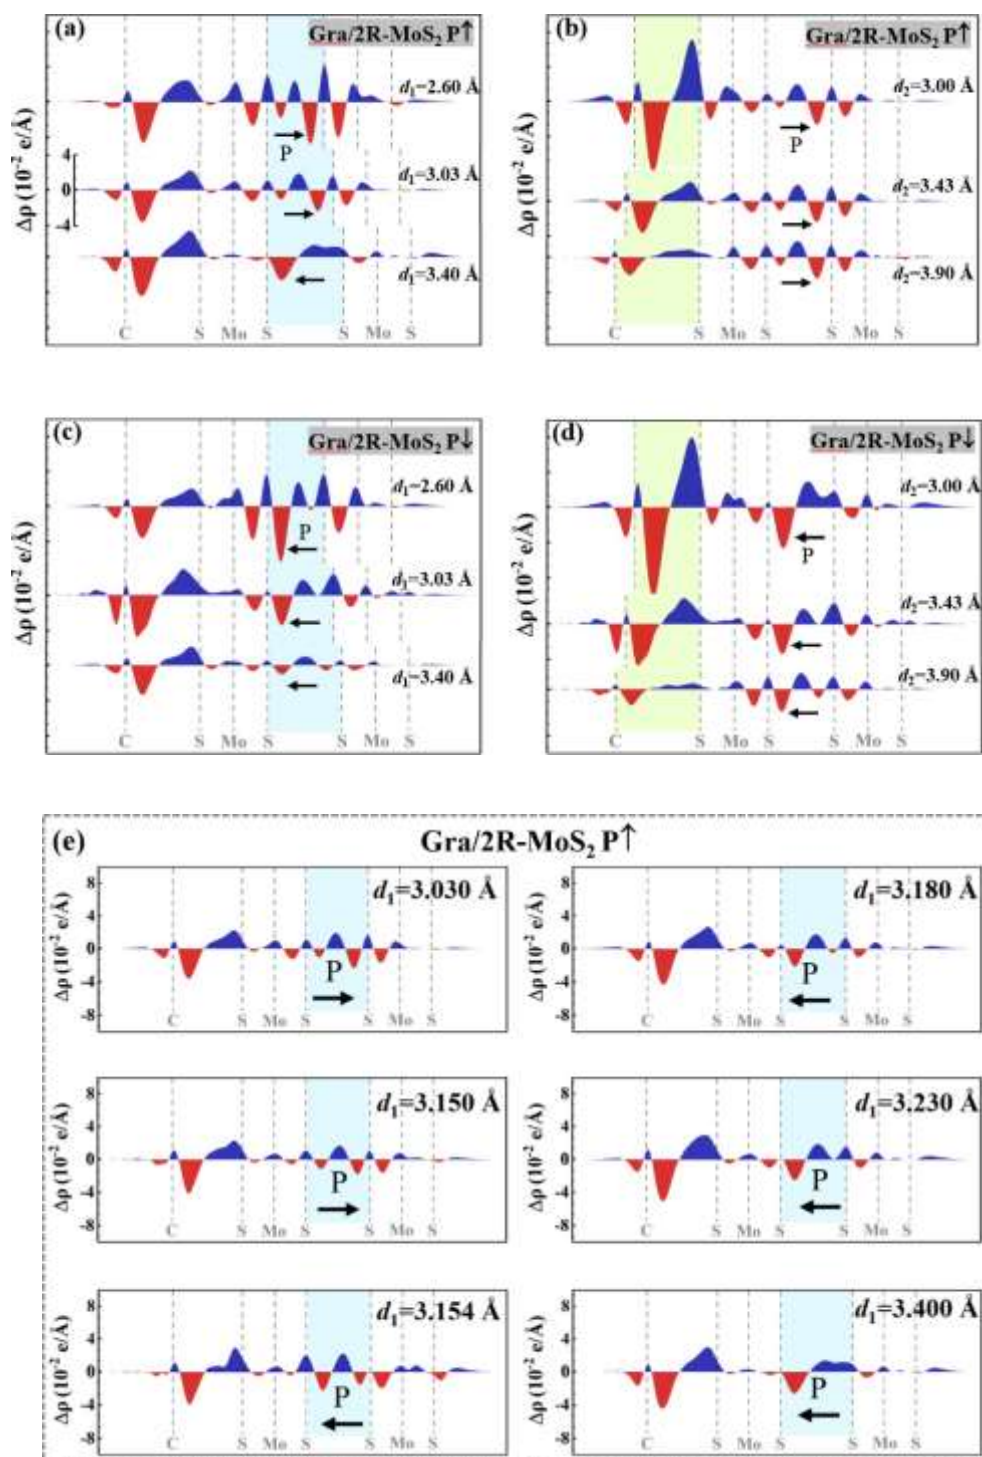

Figure S4. Planar differential charge density of Gra/2R-MoS<sub>2</sub> in (a-b) P<sup>↑</sup> and (c-d) P<sup>↓</sup> with different interface distances ( $d_1$  and  $d_2$ ). (e) interfacial polarization direction of 2R-MoS<sub>2</sub> reverses when  $d_1$  increases by 0.124 Å.



Figure. S5

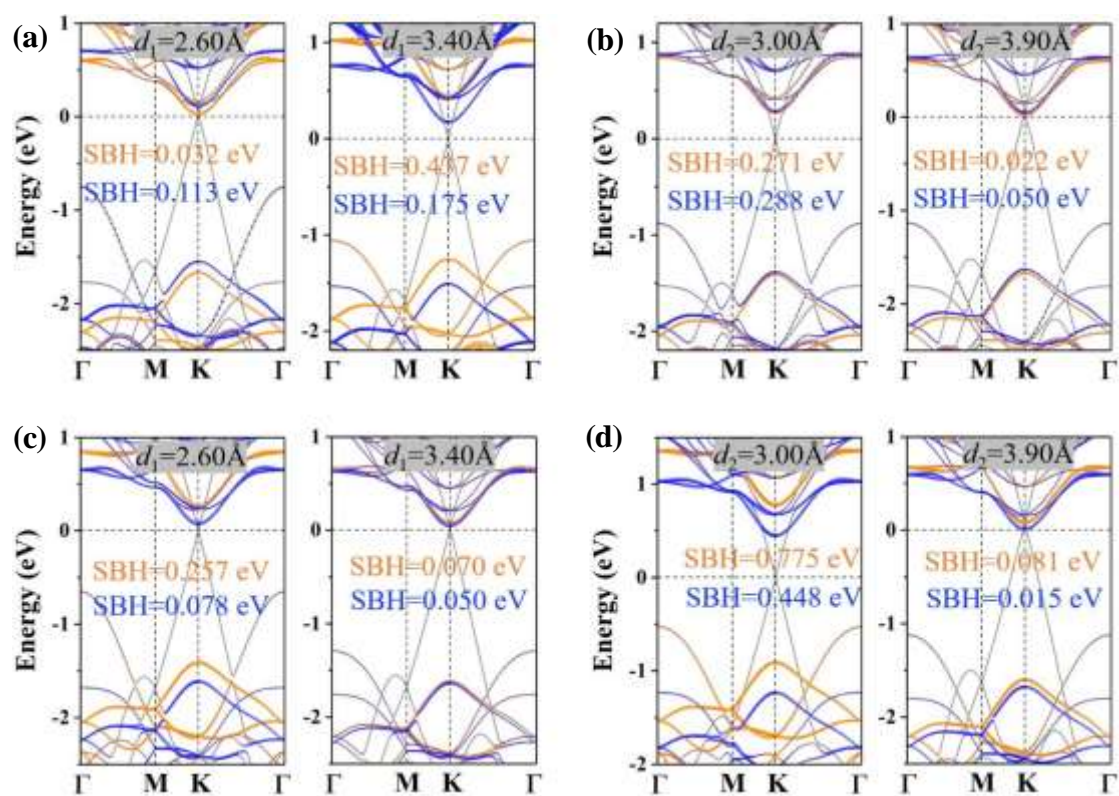

Figure. S5. Electron band structures of (a-b) Gra/2R-MoS<sub>2</sub>  $P\uparrow$  and (c-d) Gra/2R-MoS<sub>2</sub>  $P\downarrow$  with different interface distances  $d_1$  and  $d_2$ .

**Figure S6**

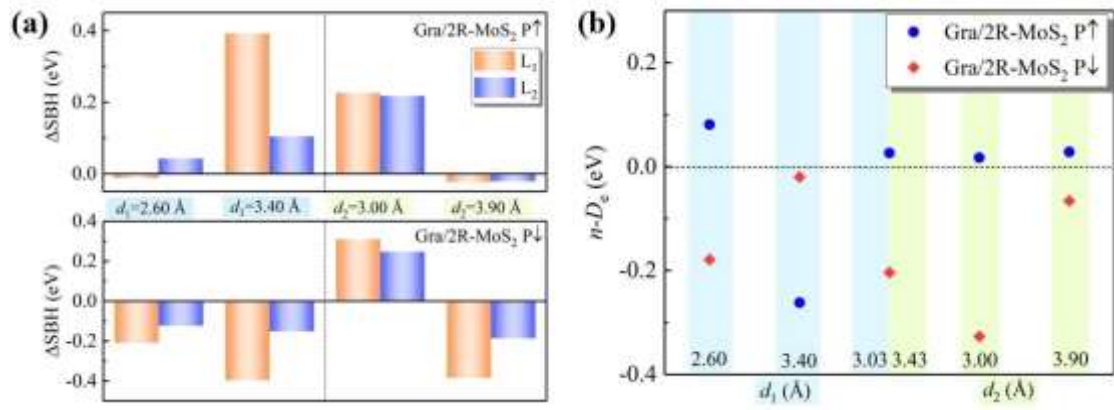

Figure S6. (a) The SBH of L<sub>1</sub> and L<sub>2</sub> in Gra/2R-MoS<sub>2</sub> changes as  $d_1$  and  $d_2$  are adjusted.

(b) band non-degeneracy ( $n-D_e$ ) of 2R-MoS<sub>2</sub> in Gra/2R-MoS<sub>2</sub> heterojunction with different  $d_1$  and  $d_2$ .

**Figure. S7**

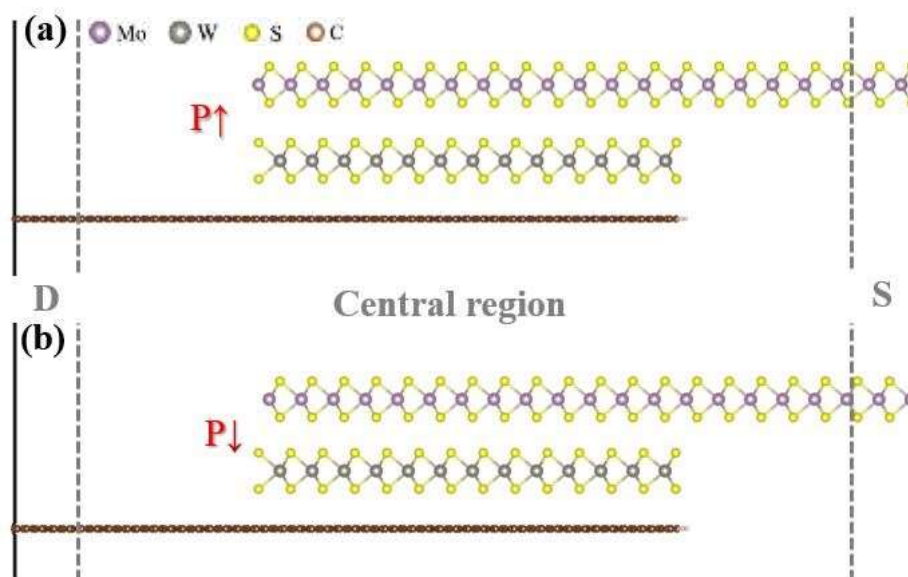

**Figure S7.** Device configurations in the DFT+NEGF calculations for 2D vdW (a) Gra/2R-MoS<sub>2</sub>  $P\uparrow$  and (b) Gra/2R-MoS<sub>2</sub>  $P\downarrow$  states. A vacuum padding of 10Å is set along the vertical direction in order to eliminate any interlayer coupling effect. The transmission intensity is indicated in logarithmic scale by color bar and the electron transmission coefficients are in Table 2.



Figure S8

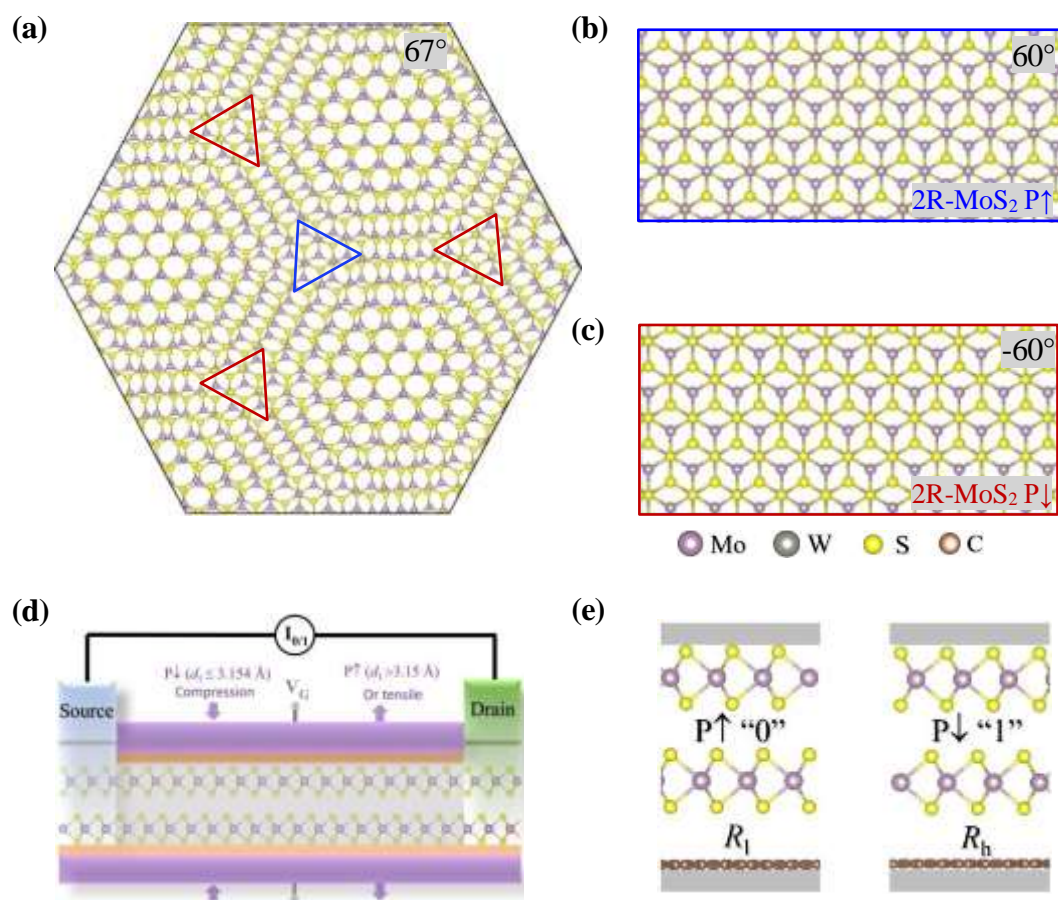

Figure S8. The moiré superlattice structure is obtained by twisting (a)  $67^\circ$ , (b)  $60^\circ$ , and (c)  $-60^\circ$  in 2H-MoS<sub>2</sub> plane direction, where blue and red triangles represent 2R-MoS<sub>2</sub> P $\uparrow$  and 2R-MoS<sub>2</sub> P $\downarrow$ , respectively. (d) Field-effect transistor and (e) memory logic unit diagram for Gra/2R-MoS<sub>2</sub>, where the purple arrow indicates the direction of the stress.  $R_l$  and  $R_h$  denote low and high resistance contacts, respectively.

Figure S9

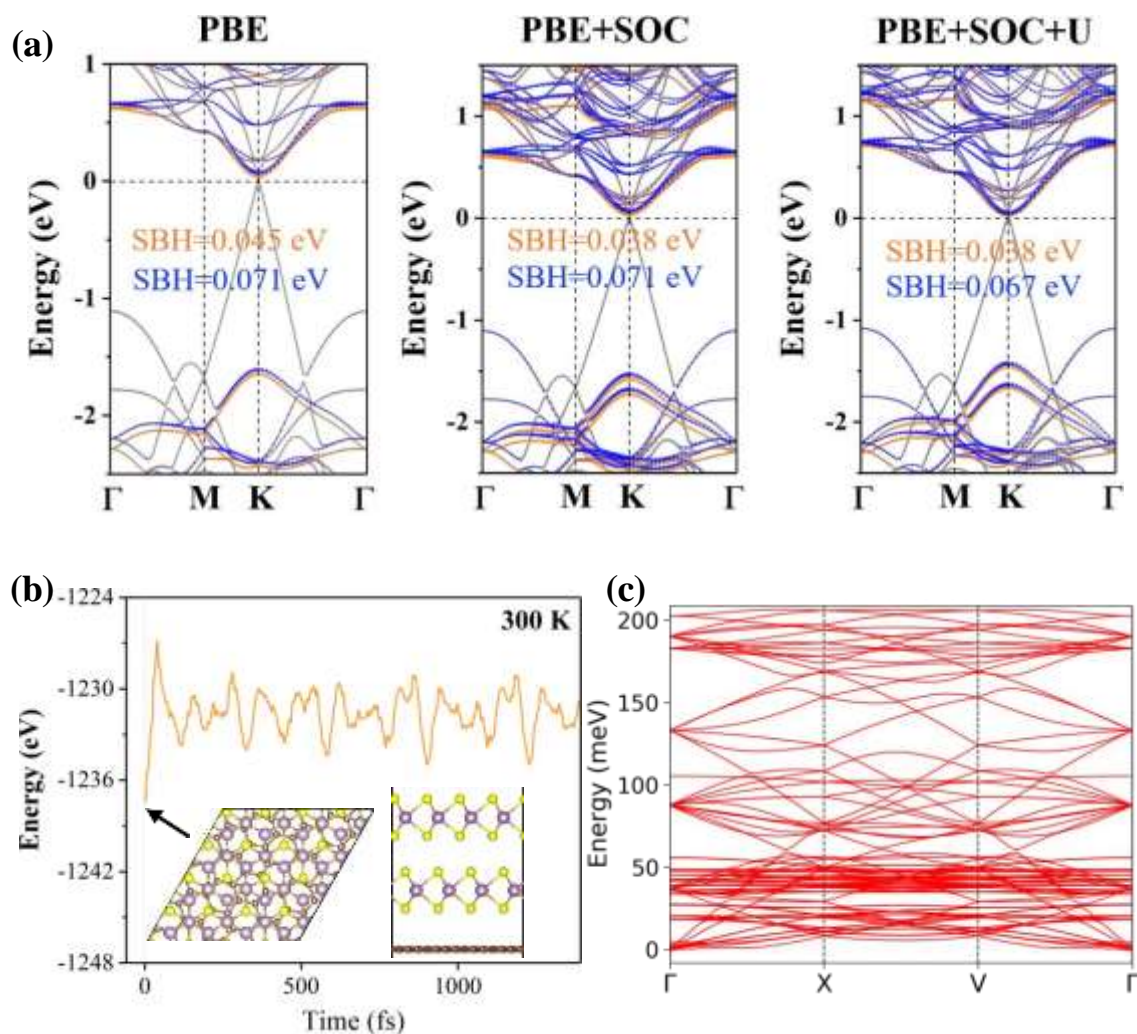

Figure S9. (a) Band structure of Gra/2R-MoS<sub>2</sub> P<sup>↑</sup> with PBE, PBE+SOC, and PBE+SOC+ $U_{eff}$  ( $U_{eff}$ = 4 eV). (b) Molecular dynamics of 2x2x1 supercell Gra/2R-MoS<sub>2</sub> P<sup>↑</sup>. (c) Phonon band structure of Gra/2R-MoS<sub>2</sub> P<sup>↑</sup>.

Figure S10

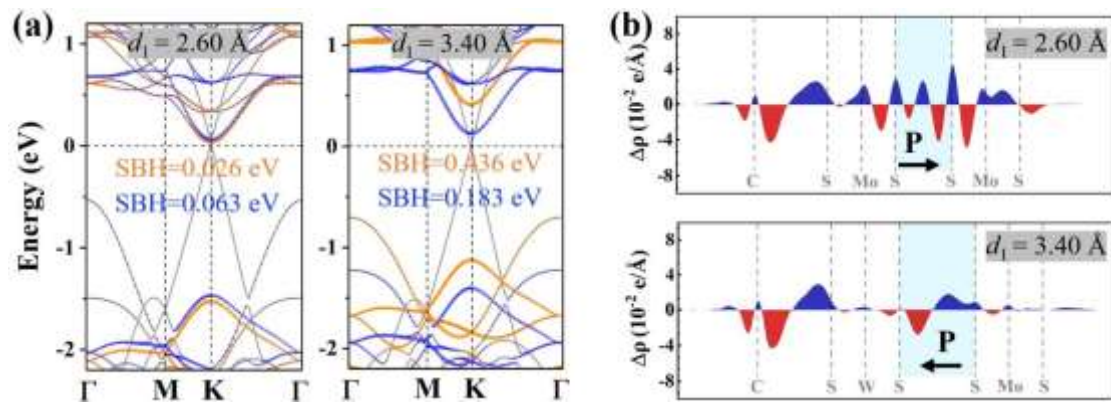

Figure S10. Band structure (a) and planar differential charge density (b) of Gra/2R-MoS<sub>2</sub> P $\uparrow$  with different interface distances  $d_1$ , in which the atoms, lattice and volume have been optimized simultaneously.

**Table S1.** Optimized lattice constant ( $a$  and  $b$ ), lattice angle ( $\alpha/\beta/\gamma$ ), and lattice mismatch rate ( $\eta$ ) of systems.

| Systems                                 | $a$ (Å) | $b$ (Å) | $\alpha/\beta/\gamma$ | $\eta$ |
|-----------------------------------------|---------|---------|-----------------------|--------|
| Gra/2H-MoS <sub>2</sub>                 | 6.32    | 6.32    | 90°/90°/60°           | 1.3%   |
| Gra/2R-MoS <sub>2</sub>                 | 6.36    | 6.36    | 90°/90°/60°           | 1.3%   |
| Gra/R-MoS <sub>2</sub> /WS <sub>2</sub> | 6.36    | 6.36    | 90°/90°/60°           | 1.3%   |
| 2R-MoS <sub>2</sub> /h-BN               | 6.49    | 6.49    | 90°/90°/60°           | 2.1%   |
| 2R-MoS <sub>2</sub> /Au                 | 11.27   | 18.63   | 90°/90°/90°           | 2.3%   |
| 2R-MoS <sub>2</sub> /Si                 | 13.00   | 13.00   | 90°/90°/60°           | 2.3%   |
